# Supplementary material for: Ley 9/1998, de 22 de diciembre, de cooperativas de Aragón (B.O.A. núm. 151, de 31 de diciembre de 1998)
Source: Royal Society of Chemistry journal article supplement (doi:10.1039/b604186h), 1999-01-01
Supplement: b604186h.pdf [file b604186h.pdf]

Supplemental Table 1 Solvent Accessibility and Protein - Propionate Contacts

| FOLD                | PDB            | PROTEIN                     | ORIGIN                                  | solvent accessibility         |       |      |       | propionate contacts (2.5-3.2Å) |     |     |     |       |   |   |
|---------------------|----------------|-----------------------------|-----------------------------------------|-------------------------------|-------|------|-------|--------------------------------|-----|-----|-----|-------|---|---|
|                     |                |                             |                                         | area                          | aver. | %    | aver. | Arg                            | His | Lys | Tyr | other |   |   |
| 4-helix bundle      | 1jgc           | bacterioferritin            | <i>Rhodobacter capsulatus</i>           | 189                           |       | 22.8 |       | 1                              | 0   | 0   | 0   | 0     | 0 |   |
|                     | 1qpu           | cyt b562                    | <i>Escherichia coli</i>                 | 148                           | 166.0 | 17.8 | 20.0  | 0                              | 0   | 0   | 0   | 0     | 0 |   |
|                     | 1bfr           | bacterioferritin            | <i>Escherichia coli</i>                 | 161                           |       | 19.4 |       | 0                              | 0   | 0   | 0   | 0     | 0 |   |
| β-propeller         | 1qhu           | hemopexin                   | <i>Oryctolagus cuniculus</i>            | 210                           |       | 25.3 |       | 2                              | 1   | 0   | 0   | 3     | 0 |   |
| CAP                 | 1ft9           | CooA                        | <i>Rhodospirillum rubrum</i>            | 233                           |       | 28.1 |       | 0                              | 0   | 0   | 0   | 0     | 1 |   |
| catalase            | 8cat           | catalase                    | <i>Bos taurus</i>                       | 3                             |       | 0.4  |       | 4                              | 1   | 0   | 0   | 0     | 0 |   |
|                     | 1qwl           | catalase                    | <i>Helicobacter pylori</i>              | 15                            |       | 1.8  |       | 4                              | 0   | 0   | 0   | 0     | 0 |   |
|                     | 1a4e           | catalase                    | <i>Saccharomyces cerevisiae</i>         | 8                             |       | 1.0  |       | 4                              | 1   | 0   | 0   | 0     | 0 |   |
|                     | 1m7s           | catalase                    | <i>Pseudomonas aeruginosa</i>           | 5                             | 11.6  | 0.6  | 1.4   | 4                              | 0   | 0   | 0   | 0     | 1 |   |
|                     | 1m85           | catalase                    | <i>Proteus mirabilis</i>                | 27                            |       | 3.3  |       | 4                              | 0   | 0   | 0   | 0     | 0 |   |
|                     | 1dgf           | catalase                    | <i>Homo sapiens</i>                     | 2                             |       | 0.2  |       | 3                              | 1   | 0   | 0   | 0     | 0 |   |
|                     | 1hbz           | catalase                    | <i>Micrococcus</i>                      | 30                            |       | 3.6  |       | 4                              | 0   | 0   | 0   | 0     | 1 |   |
|                     | 1jph           | catalase                    | <i>Escherichia coli</i>                 | 3                             |       | 0.4  |       | 2                              | 0   | 0   | 0   | 0     | 1 |   |
| cupredoxin-like     | 1fft           | ubiquinol oxidase           | <i>Escherichia coli</i>                 | 32                            |       | 3.9  |       | 3                              | 0   | 0   | 0   | 0     | 1 |   |
| cytochrome b5       | 1eue           | cyt b5                      | <i>Rattus norvegicus</i>                | 219                           |       | 26.4 |       | 0                              | 0   | 0   | 0   | 0     | 2 |   |
|                     | 1cxy           | cyt b5                      | <i>Ectothiorhodospira v.</i>            | 103                           | 184.3 | 12.4 | 22.2  | 0                              | 0   | 2   | 1   | 2     | 2 |   |
|                     | 1cyo           | cyt b5                      | <i>Bos taurus</i>                       | 216                           |       | 26.0 |       | 0                              | 0   | 0   | 0   | 0     | 2 |   |
|                     | 1sox           | sulfite oxidase             | <i>Gallus gallus</i>                    | 199                           |       | 24.0 |       | 0                              | 1   | 0   | 0   | 0     | 0 |   |
| dioxygenase         | 2d0t           | indoleamine 2,3-dioxygenase | <i>Homo sapiens</i>                     | 92                            |       | 11.1 |       | 3                              | 0   | 0   | 0   | 0     | 1 |   |
| globin-like         | 1q1f           | neuroglobin                 | <i>Mus musculus</i>                     | 132                           |       | 15.9 |       | 0                              | 0   | 2   | 2   | 2     | 0 |   |
|                     | 1oj6           | neuroglobin                 | <i>Homo sapiens</i>                     | 90                            |       | 10.8 |       | 0                              | 0   | 2   | 2   | 2     | 2 |   |
|                     | 1d8u           | hemoglobin                  | <i>Oryza sativa</i>                     | 102                           |       | 12.3 |       | 1                              | 0   | 0   | 0   | 0     | 1 |   |
|                     | 1vhb           | hemoglobin                  | <i>Vitreoscilla stercoraria</i>         | 169                           |       | 20.4 |       | 0                              | 0   | 1   | 0   | 0     | 0 |   |
|                     | 1a3n           | hemoglobin                  | <i>Homo sapiens</i>                     | 134                           |       | 16.1 |       | 0                              | 1   | 1   | 0   | 0     | 1 |   |
|                     | 1myt           | myoglobin                   | <i>Thunnus albacares</i>                | 143                           | 134.8 | 17.2 | 16.2  | 0                              | 1   | 2   | 0   | 0     | 1 |   |
|                     | 1spe           | myoglobin                   | <i>Physeter catodon</i>                 | 147                           |       | 17.7 |       | 0                              | 2   | 0   | 0   | 0     | 1 |   |
|                     | 1lhs           | myoglobin                   | <i>Caretta caretta</i>                  | 171                           |       | 20.6 |       | 0                              | 1   | 0   | 0   | 0     | 1 |   |
|                     | 1v5h/1ut0      | cytoglobin                  | <i>Homo sapiens</i>                     | 135                           |       | 16.3 |       | 0                              | 0   | 2   | 0   | 0     | 1 |   |
|                     | 1cqx           | flavo-hemoglobin            | <i>Alcaligenes eutrophus</i>            | 219                           |       | 26.4 |       | 0                              | 0   | 1   | 0   | 0     | 2 |   |
|                     | 1gvh           | flavo-hemoglobin            | <i>Escherichia coli</i>                 | 39                            |       | 4.7  |       | 0                              | 1   | 0   | 0   | 0     | 2 |   |
|                     | 1fsl           | leghemoglobin               | <i>Glycine max</i>                      | 136                           |       | 16.4 |       | 0                              | 0   | 1   | 0   | 0     | 0 |   |
|                     | heme oxygenase | 1n45                        | heme oxygenase                          | <i>Homo sapiens</i>           | 247   |      | 29.8  |                                | 1   | 0   | 2   | 1     | 1 | 1 |
|                     |                | 1j77                        | heme oxygenase                          | <i>Neisseria meningitidis</i> | 210   |      | 25.3  |                                | 0   | 0   | 1   | 1     | 0 | 0 |
| 1we1                |                | heme oxygenase              | <i>Synechocystis</i>                    | 127                           | 184.8 | 15.3 | 22.3  | 4                              | 0   | 1   | 1   | 1     | 0 |   |
| 1iw0/1              |                | heme oxygenase              | <i>Corynebacterium diphtheriae</i>      | 155                           |       | 18.7 |       | 1                              | 0   | 1   | 1   | 0     | 0 |   |
| heme peroxidase     | 2cyp           | cyt c peroxidase            | <i>Saccharomyces cerevisiae</i>         | 24                            |       | 2.9  |       | 0                              | 3   | 1   | 0   | 0     | 2 |   |
|                     | 1itk           | catalase-peroxidase         | <i>Haloarcula m.</i>                    | 20                            |       | 2.4  |       | 0                              | 2   | 1   | 0   | 0     | 2 |   |
|                     | 2gj1           | lactoperoxidase             | <i>Bos taurus</i>                       | 61                            | 72.0  | 7.3  | 8.7   | 3                              | 0   | 0   | 0   | 0     | 2 |   |
|                     | 1mwv           | catalase-peroxidase         | <i>Burkholderia p.</i>                  | 30                            |       | 3.6  |       | 0                              | 2   | 1   | 0   | 0     | 2 |   |
|                     | 1prh           | prostaglandin synthase      | <i>Seminal vesicl</i>                   | 141                           |       | 17.0 |       | 0                              | 0   | 0   | 0   | 0     | 4 |   |
|                     | 5cox           | prostaglandin synthase      | <i>Mus musculus</i>                     | 156                           |       | 18.8 |       | 0                              | 0   | 0   | 0   | 0     | 4 |   |
| HemS                | 2j0p           | HemS                        | <i>Yersinia enterocolitica</i>          | 155                           |       | 18.7 |       | 4                              | 0   | 1   | 1   | 1     | 1 |   |
| H-NOX / SONO fold   | 1u55           | guanylate cyclase           | <i>Thermoanaerobacter tengcongensis</i> | 6                             | 18.5  | 0.7  | 2.2   | 4                              | 0   | 0   | 0   | 0     | 0 |   |
|                     | 1xbn           | SONO                        | <i>Thermoanaerobacter tengcongensis</i> | 31                            |       | 3.7  |       | 3                              | 0   | 0   | 0   | 1     | 2 |   |
| immunoglobulin-like | 1d7b           | cellobiose dehydrogenase    | <i>Phanerochaete chrysosporium</i>      | 179                           |       | 21.6 |       | 0                              | 0   | 0   | 2   | 3     | 3 |   |
| lipocalin           | 1np4           | nitrophorin                 | <i>Rhodnius prolixus</i>                | 130                           |       | 15.7 |       | 0                              | 0   | 2   | 0   | 0     | 1 |   |
| meander             | 1dk0           | hasA                        | <i>Serratia marcescens</i>              | 191                           |       | 23.0 |       | 0                              | 1   | 0   | 0   | 1     | 4 |   |
| NO                  | 1nos           | NO synthase                 | <i>Mus musculus</i>                     | 159                           |       | 19.2 |       | 1                              | 0   | 0   | 0   | 0     | 0 |   |
|                     | 3nos           | NO synthase                 | <i>Homo sapiens</i>                     | 122                           |       | 14.7 |       | 0                              | 0   | 0   | 0   | 1     | 0 |   |
|                     | 1m7z           | NO synthase                 | <i>Bacillus subtilis</i>                | 102                           | 127.8 | 12.3 | 15.4  | 0                              | 0   | 0   | 0   | 1     | 0 |   |
|                     | 1qw6           | NO synthase                 | <i>Rattus norvegicus</i>                | 128                           |       | 15.4 |       | 0                              | 0   | 0   | 0   | 2     | 0 |   |
| P450                | 2cpp           | P450 mono-oxygenase         | <i>Pseudomonas putida</i>               | 28                            |       | 3.4  |       | 3                              | 1   | 0   | 0   | 0     | 3 |   |
|                     | 1cpt           | Cytochrome P450-Terp        | <i>Pseudomonas Sp.</i>                  | 17                            |       | 2.0  |       | 1                              | 2   | 0   | 0   | 0     | 0 |   |
|                     | 1pq2           | P450 mono-oxygenase         | <i>Homo sapiens</i>                     | 17                            |       | 2.0  |       | 5                              | 2   | 0   | 0   | 0     | 2 |   |
|                     | 1po5           | P450 mono-oxygenase         | <i>Oryctolagus cuniculus</i>            | 23                            |       | 2.8  |       | 3                              | 2   | 0   | 0   | 0     | 1 |   |
|                     | 1dt6           | P450 oxidoreductase         | <i>Oryctolagus cuniculus</i>            | 2                             |       | 0.2  |       | 4                              | 3   | 0   | 0   | 0     | 1 |   |
|                     | 1odo           | P450 mono-oxygenase         | <i>Streptomyces coelicolor</i>          | 16                            |       | 1.9  |       | 4                              | 2   | 0   | 0   | 1     | 0 |   |
|                     | 1rom           | P450 mono-oxygenase         | <i>Fusarium oxysporium</i>              | 10                            |       | 1.2  |       | 1                              | 2   | 0   | 0   | 0     | 0 |   |
|                     | 1f4t           | P450 mono-oxygenase         | <i>Sulfolobus solfataricus</i>          | 39                            | 25.5  | 4.7  | 3.1   | 3                              | 1   | 0   | 0   | 0     | 1 |   |
|                     | 2hpd/1fah      | P450 oxidoreductase         | <i>Bacillus megaterium</i>              | 19                            |       | 2.3  |       | 2                              | 0   | 0   | 0   | 0     | 1 |   |
|                     | 1e9x           | P450 α-sterol demethylase   | <i>Mycobacterium tuberculosis</i>       | 51                            |       | 6.1  |       | 2                              | 1   | 1   | 1   | 1     | 3 |   |
|                     | 1n40           | P450 oxidoreductase         | <i>Mycobacterium tuberculosis</i>       | 15                            |       | 1.8  |       | 4                              | 2   | 0   | 0   | 0     | 0 |   |
|                     | 1lfk           | P450 oxidoreductase         | <i>Amycolatopsis orientalis</i>         | 29                            |       | 3.5  |       | 3                              | 2   | 0   | 0   | 0     | 2 |   |
|                     | 1izo           | P450 oxidoreductase         | <i>Bacillus Subtilis</i>                | 65                            |       | 7.8  |       | 2                              | 2   | 1   | 1   | 1     | 0 |   |
| PAS                 | 1drm           | FixL                        | <i>Bradorhizobium japonicum</i>         | 40                            | 105.0 | 4.8  | 12.7  | 2                              | 4   | 0   | 0   | 0     | 1 |   |
|                     | 1v9y/z         | EcDos                       | <i>Escherichia coli</i>                 | 170                           |       | 20.5 |       | 0                              | 0   | 0   | 0   | 0     | 0 |   |
| serum albumin-like  | 1n5u           | albumin                     | <i>Homo sapiens</i>                     | 66                            |       | 7.9  |       | 0                              | 1   | 1   | 0   | 0     | 0 |   |
| vitamine B6 family  | 1jbq           | cystathione beta-synthase   | <i>Homo sapiens</i>                     | 148                           |       | 17.8 |       | 4                              | 0   | 0   | 0   | 0     | 0 |   |

Sum of contacts  
total number of contacts  
PERCENTAGE

PERCENTAGES FOLDS

|                     | 103                            | 46   | 28   | 24   | 67    |
|---------------------|--------------------------------|------|------|------|-------|
|                     | 103                            | 46   | 28   | 24   | 67    |
|                     | 38.4                           | 17.2 | 10.4 | 9.0  | 25.0  |
|                     | propionate contacts (2.5-3.2Å) |      |      |      |       |
| 4-helix bundle      | 100.0                          | 0.0  | 0.0  | 0.0  | 0.0   |
| β-propeller         | 33.3                           | 16.7 | 0.0  | 50.0 | 0.0   |
| CAP                 | 0.0                            | 0.0  | 0.0  | 0.0  | 100.0 |
| catalase            | 82.9                           | 8.6  | 0.0  | 0.0  | 8.6   |
| cupredoxin-like     | 75.0                           | 0.0  | 0.0  | 0.0  | 25.0  |
| cytochrome b5       | 0.0                            | 10.0 | 20.0 | 10.0 | 60.0  |
| dioxygenase         | 75.0                           | 0.0  | 0.0  | 0.0  | 25.0  |
| globin-like         | 2.9                            | 17.1 | 34.3 | 11.4 | 34.3  |
| heme oxygenase      | 37.5                           | 0.0  | 31.3 | 25.0 | 6.3   |
| heme peroxidase     | 10.3                           | 24.1 | 10.3 | 0.0  | 55.2  |
| HemS                | 57.1                           | 0.0  | 14.3 | 14.3 | 14.3  |
| H-NOX / SONO        | 70.0                           | 0.0  | 0.0  | 10.0 | 20.0  |
| immunoglobulin-like | 0.0                            | 0.0  | 0.0  | 40.0 | 60.0  |
| lipocalin           | 0.0                            | 0.0  | 66.7 | 0.0  | 33.3  |
| meander             | 0.0                            | 16.7 | 0.0  | 16.7 | 66.7  |
| NO                  | 20.0                           | 0.0  | 0.0  | 80.0 | 0.0   |
| P450                | 47.4                           | 28.2 | 2.6  | 3.8  | 17.9  |
| PAS                 | 28.6                           | 57.1 | 0.0  | 0.0  | 14.3  |
| serum albumin-like  | 0.0                            | 50.0 | 50.0 | 0.0  | 0.0   |
| vitamin B6 family   | 100.0                          | 0.0  | 0.0  | 0.0  | 0.0   |
|                     | Arg                            | His  | Lys  | Tyr  | other |
